# Supplementary material
Source: PubMed Central journal article supplement (PMC3752136)
Supplement: mmc1.pdf [file mmc1.pdf]

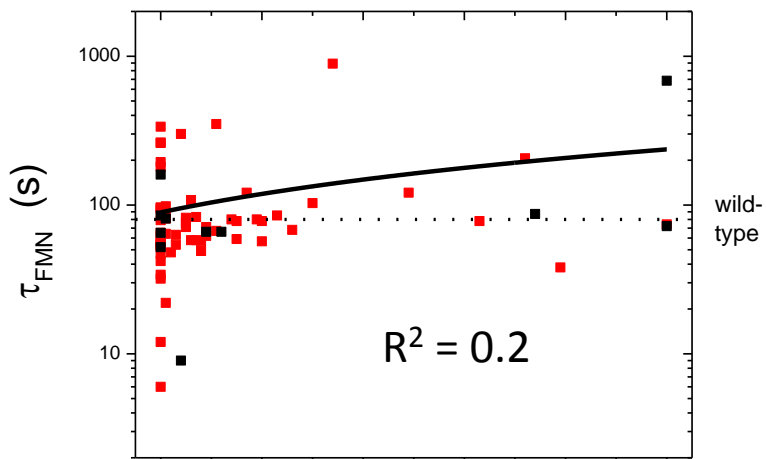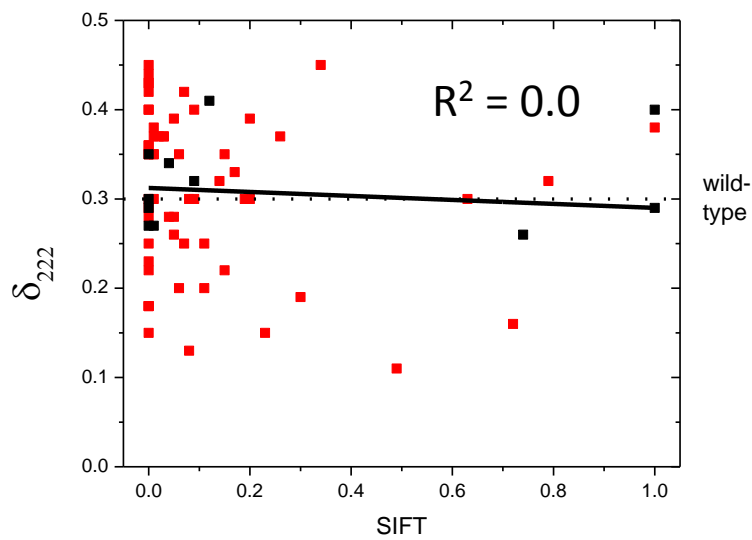

**A**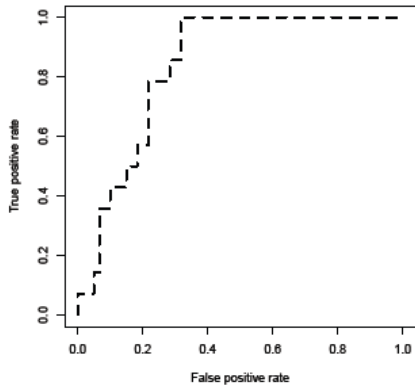**B**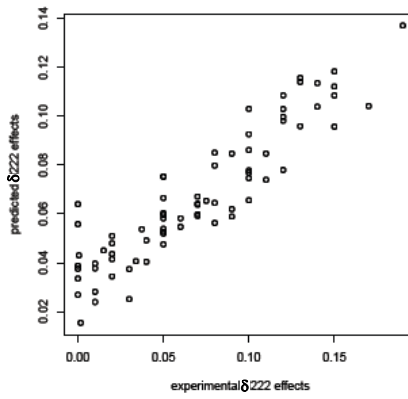**C**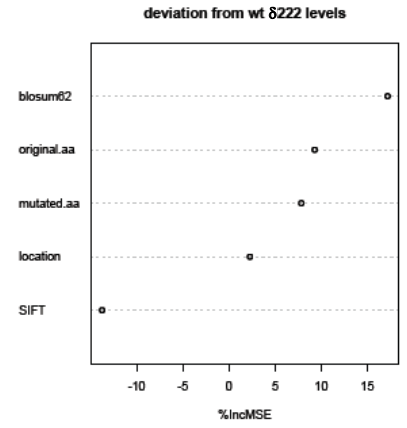**D**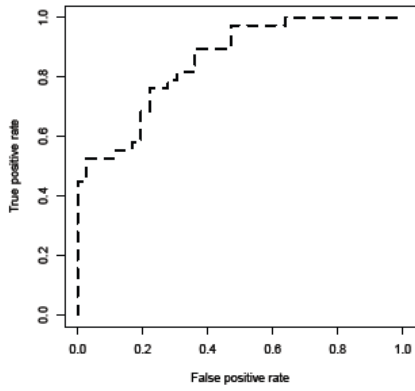**E**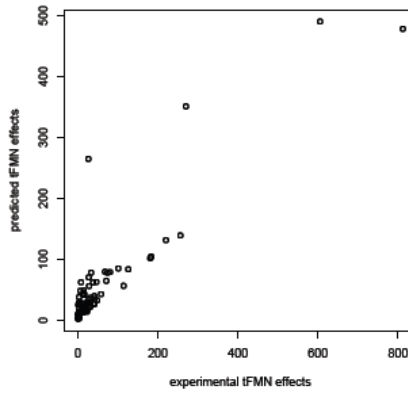**F**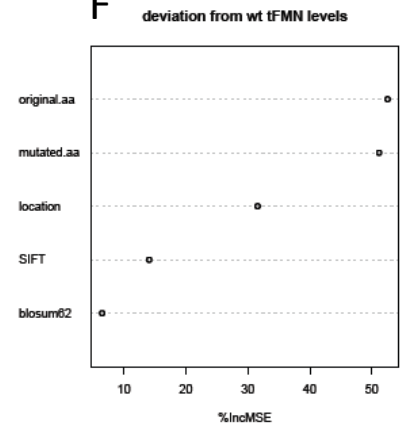

| Variant                         | $\delta 222$ | $\tau$ FMN | BLOSUM62 | SIFT | NMR                   |
|---------------------------------|--------------|------------|----------|------|-----------------------|
| WT                              | 0.3          | 80         |          |      | WT Like               |
| $\Delta J\alpha$                | 0.20         | 80         |          |      | $\Delta J\alpha$ Like |
| $\Delta 408-411$                | 0.15         | 71         |          |      | $\Delta J\alpha$ Like |
| $\Delta 408-411 \Delta J\alpha$ | 0.10         | 83         |          |      |                       |
| $\Delta 410-412$                | 0.34         | 72         |          |      |                       |
| T407P                           | 0.27         | 81         | 1        | 0.01 |                       |
| L408D                           | 0.18         | 96         | -4       | 0.00 | $\Delta J\alpha$ Like |
| E409P                           | 0.35         | 98         | -1       | 0.01 | $\Delta J\alpha$ Like |
| R410G                           | 0.35         | 78         | -2       | 0.15 |                       |
| R410P                           | 0.20         | 108        | -2       | 0.06 | $\Delta J\alpha$ Like |
| K413A                           | 0.22         | 59         | -1       | 0.15 | WT Like               |
| N414V                           | 0.25         | 350        | -2       | 0.11 |                       |
| N414S                           | 0.40         | 685        | 1        | 1.00 |                       |
| N414T                           | 0.45         | 892        | 0        | 0.34 | WT Like               |
| F415E                           | 0.29         | 65         | -4       | 0.00 |                       |
| V416A                           | 0.38         | 22         | 0        | 0.01 |                       |
| T418V                           | 0.28         | 56         | 0        | 0.00 |                       |
| D419A                           | 0.40         | 77         | -2       | 0.00 | WT Like               |
| R421G                           | 0.28         | 82         | -2       | 0.05 |                       |
| R421D                           | 0.25         | 58         | -2       | 0.07 |                       |
| D424A                           | 0.35         | 194        | -2       | 0.00 |                       |
| I427A                           | 0.22         | 6          | -1       | 0.00 |                       |
| I427G                           | NA           | NA         | -4       | 0.00 |                       |
| I427V                           | 0.34         | 9          | 3        | 0.04 |                       |
| I428G                           | NA           | NA         | -4       | 0.00 |                       |
| I428M                           | 0.35         | 52         | 1        | 0.00 |                       |
| I428T                           | 0.40         | 53         | -1       | 0.00 |                       |
| I428V                           | 0.29         | 72         | 3        | 1.00 |                       |
| F429Y                           | 0.32         | 66         | 3        | 0.09 |                       |
| S431A                           | 0.29         | 65         | 1        | 0.00 |                       |
| D432A                           | 0.37         | 54         | -2       | 0.03 |                       |
| S433L                           | 0.37         | 48         | -2       | 0.02 |                       |
| S433V                           | 0.37         | 64         | -2       | 0.01 |                       |
| F434L                           | 0.35         | 12         | 0        | 0.00 | WT Like               |
| L435A                           | 0.44         | 263        | -1       | 0.00 |                       |
| T438V                           | 0.23         | 32         | 0        | 0.00 | WT Like               |
| E439A                           | 0.26         | 71         | -1       | 0.05 | WT Like               |
| Y440E                           | NA           | NA         | -2       | 0.00 |                       |
| R442L                           | 0.33         | 121        | -2       | 0.17 |                       |
| E443A                           | 0.35         | 58         | -1       | 0.06 |                       |
| E444A                           | 0.43         | 75         | -1       | 0.00 | WT Like               |
| I445A                           | 0.42         | 336        | -1       | 0.00 |                       |
| L446E                           | 0.45         | 42         | -3       | 0.00 |                       |
| N449A                           | NA           | NA         | -2       | 0.00 |                       |
| C450V                           | 0            | 0          | -1       | 0.00 | WT Like               |

|       |      |     |    |      |         |
|-------|------|-----|----|------|---------|
| C450G | 0    | 0   | -3 | 0.01 | WT Like |
| R451A | NA   | NA  | -1 | 0.00 |         |
| F452L | 0.28 | 300 | 0  | 0.04 | WT Like |
| L453V | 0.30 | 160 | 1  | 0.00 | WT Like |
| Q454A | NA   | NA  | -1 | 0.00 |         |
| Q454D | NA   | NA  | 0  | 0.00 |         |
| G455A | NA   | NA  | 0  | 0.00 |         |
| R460A | 0.30 | 78  | -1 | 0.20 |         |
| T462V | 0.13 | 57  | 0  | 0.08 |         |
| I466A | NA   | NA  | -1 | 0.00 |         |
| R467A | 0.36 | 96  | -1 | 0.00 |         |
| A469G | 0.39 | 40  | 0  | 0.01 | WT Like |
| D471V | 0.37 | 68  | -3 | 0.26 |         |
| E475A | 0.20 | 67  | -1 | 0.11 | WT Like |
| V476F | 0.37 | 63  | -1 | 0.03 |         |
| T477V | 0.30 | 71  | 0  | 0.09 |         |
| Q479L | 0.30 | 49  | -2 | 0.08 |         |
| L480A | 0.30 | 34  | -1 | 0.00 |         |
| I481A | NA   | NA  | -1 | 0.00 |         |
| N482A | NA   | NA  | -2 | 0.00 |         |
| Y483E | NA   | NA  | -2 | 0.00 |         |
| T484V | 0.40 | 62  | 0  | 0.09 |         |
| K485A | 0.43 | 93  | -1 | 0.00 |         |
| K485L | 0.43 | 62  | -2 | 0.00 |         |
| F490L | 0.15 | 47  | 0  | 0.00 |         |
| W491Y | 0.27 | 85  | 2  | 0.00 |         |
| W491K | 0.29 | 79  | -3 | 0.00 |         |
| N492A | 0.18 | 54  | -2 | 0.00 |         |
| N492Q | NA   | NA  | 0  | 0.00 |         |
| L493A | 0.11 | 121 | -1 | 0.49 | Neither |
| F494L | 0.16 | 206 | 0  | 0.72 | WT Like |
| F494N | NA   | NA  | -3 | 0.00 |         |
| F494W | NA   | NA  | 1  | 0.00 |         |
| F494Y | NA   | NA  | 3  | 0.00 |         |
| H495L | 0.15 | 85  | -3 | 0.23 |         |
| L496F | 0.35 | 84  | 0  | 0.01 |         |
| Q497A | 0.38 | 74  | -1 | 1.00 |         |
| M499A | 0.30 | 81  | -1 | 0.01 |         |
| R500A | 0.39 | 57  | -1 | 0.20 | WT Like |
| D501G | 0.32 | 80  | -1 | 0.14 |         |
| Q502A | 0.30 | 78  | -1 | 0.63 |         |
| F509L | 0.40 | 181 | 0  | 0.00 | WT Like |
| F509Y | 0.41 | 66  | 3  | 0.12 |         |
| G511V | NA   | NA  | -3 | 0.00 |         |
| Q513A | 0.18 | 261 | -1 | 0.00 | WT Like |
| L514A | 0.42 | 83  | -1 | 0.07 | WT Like |
| D515L | 0.36 | 56  | -4 | 0.00 |         |

|                         |      |      |    |      |         |
|-------------------------|------|------|----|------|---------|
| D515V                   | 0.25 | 54   | -3 | 0.00 |         |
| T517V                   | 0.39 | 76   | 0  | 0.05 |         |
| H519A                   | 0.30 | 80   | -2 | 0.19 |         |
| G528A                   | 0.32 | 38   | 0  | 0.79 |         |
| E541K                   | 0.26 | 87   | 1  | 0.74 |         |
| G528V                   | 0.19 | 103  | -3 | 0.30 |         |
| T406A/T407A             | 0.38 | 56   |    |      | WT Like |
| D432A/Q436A             | 0.36 | 73   |    |      | WT Like |
| D432A/Q436A/E443A       | 0.29 | 76   |    |      |         |
| D432A/Q436A/T406A/T407A | 0.33 | 62   |    |      |         |
| S441A/E443A             | 0.45 | 85   |    |      |         |
| S441A/E443A/T406A/T407A | 0.45 | 70   |    |      |         |
| G ins at 519            | 0.35 | 55   |    |      |         |
| GGG ins at 519          |      | 0.31 | 68 |      |         |

---
